# Supplementary material
Source: Research Square preprint supplement (doi:10.21203/rs.3.rs-9615677/v1)
Supplement: Supplementary file 1 [file 538d8d89b9d873f6bc3232b4.docx]

**Supplementary Content**

**Niche Remodeling in Metastatic Breast Cancer: LGALS9-CD44-Mediated Crosstalk Between Malignant Luminal Cells and Fibroblasts**

**Methods**

**Primary CAF and NF isolation from BC**

Primary human fibroblasts were isolated from freshly collected breast cancer (BC) specimens (designated as cancer-associated fibroblasts, CAFs) and corresponding non-tumorous adjacent tissues (NFs). Immediately following surgical resection, tissue samples were preserved in specialized storage buffer (Miltenyi) and thoroughly washed using phosphate-buffered saline (PBS) containing 1% antibiotic–antimycotic solution (Gibco, Life Technologies). The specimens were then finely dissected into 1–2 mm³ fragments and subjected to enzymatic digestion with a Human Tumor Dissociation Kit on a gentleMACS Octo Dissociator (Miltenyi), strictly following the supplier's guidelines.

After digestion, the cell suspensions were filtered through 70 μm meshes and centrifuged at 250g for 5 minutes to pellet the cells. The isolated cells were cultivated in Dulbecco's Modified Eagle Medium (DMEM, Gibco) enriched with 10% fetal bovine serum (FBS) and 1% antibiotic, and performed with mycoplasma-free cells. The culture medium was replaced every 72 hours. Purity based on differential adhesion kinetics was verified through immunofluorescence staining, confirming that the CAFs and NFs were positive for FN1 and α-SMA (Figure S6). All functional assays were conducted using cells within ten passages. Relevant clinical metadata of the patient donors from whom CAFs and NFs were derived can be found in Table S1. The acquisition of all samples complied with ethical standards, including informed consent and approval from the Ethics Committee of Jiangsu Cancer Hospital.

For genetic manipulation involving knockdown or overexpression, early-passage fibroblasts were transduced with lentiviral vectors at a multiplicity of infection (MOI) of 100. Transduction was carried out at 37 °C in the presence of 5 μg/mL polybrene (Sigma).

**Co-cultivation system**

Primary human fibroblasts were obtained as described above and BC cell lines (MCF10A, BT549, HCC1954, MDA-MB-468, MCF7, MDA-MB-231) were provided by National Collection of Authenticated Cell Cultures with STR authentication. When the fibroblasts grew to 90% confluence, fresh RPMI DMEM medium containing 10% FBS was replaced, and the supernatant of the cells (conditioned medium, CM) was extracted every 2 days and frozen in -80 C for future use.

We stimulated fibroblasts cells with LGALS9 human recombinant protein (rhLG, R&D Systems, No.1433-OP), while adding siRNA to inhibit CD44 expression to block LGALS9 from binding of target.

**ELISA**

First, 50 μl of each sample was dispensed into the assay wells, and 500 μl of the prepared working solution was introduced. The plate was subsequently subjected to incubation at 37 °C for 90 minutes (LGALS9: CUSABIO, CSB-EL012895HU). Following five rinsing cycles, 100 μl of HRP-conjugated detection antibody was added to every well and the plate was again incubated for 1.5 hours at 37 °C. After three additional washes, 90 μl of chromogenic substrate was introduced and allowed to react for 15 minutes at 37 °C under light-protected conditions. The reaction was terminated using 50 μl of stop solution. Absorbance at 450 nm was recorded within five minutes, and sample concentrations were determined by interpolation from the standard curve.

**Western blotting**

The entire protein extract was subjected to SDS-PAGE and subsequently transferred onto membranes, following a previously described method引. Primary and secondary antibodies used in the research were as follows: anti-Vimentin (5741, CST), E-cadherin (3195, CST), Twist (904445, CST), SMAD2 (5339, CST), SMAD3 (9523, CST), p-Smad2/3 (80427-2-RR, Proteintech), LGALS9 (54330, CST), a-SMA (14395-1-AP, Proteintech), CD44 (15675-1-AP, Proteintech).

**Transwell**

A 24-well transwell system with 8.0 μm pores (Corning) was utilized to examine the migration of BC cell lines and primary human fibroblasts. In brief, cell lines or fibroblasts were plated in the upper insert in RPMI DMEM medium without serum. The lower chamber contained RPMI DMEM with 10% FBS to act as a chemoattractant.

To investigate their influence on fibroblast migration, the following agents were introduced to the upper chamber: conditioned media from MCF10A (MCF10A_CM), BT549 (BT549_CM), HCC1954 (HCC1954_CM), MDA-MB-468 (MDA-MB-468_CM), MCF7 (MCF7_CM), and MDA-MB-231 (MDA-MB-231_CM) cells, and recombinant human LGALS9. Likewise, to evaluate effects on BC cell lines migration, the upper compartment was supplemented with NF-conditioned medium (NF-CM), CAF-conditioned medium (CAF-CM) and siLGALS9 (LGALS9#siNC_CM, LGALS9#si1_CM, LGALS9#si2_CM).

Following a 24-hour incubation, membranes were collected and cells that had traversed the pores were fixed in 4% paraformaldehyde and stained using 0.5% crystal violet. After rinsing with 1×PBS, the membranes were imaged with a light microscope (Olympus Corporation, Japan) at 100× magnification. Cells were counted in five randomly chosen visual fields per membrane, and the average number was computed.

**Conditioned medium of primary fibroblasts /siRNA/ LV-CD44**

Cells were plated in 6-well plates at a density of 5 × 10⁵ cells per well and cultured until reaching 70–90% confluency. Transfection was performed using Lipofectamine™ 3000 according to the manufacturer’s instructions. Briefly, dilutions of Lipofectamine™ 3000 and siRNA were prepared separately in Opti-MEM™ medium, combined at equal volumes, and incubated for 15-20 minutes at room temperature. The resulting mixture was then applied to the cells. After transfection, the cells were cultured for an additional 48 hours at 37 °C before being harvested for downstream applications. Lentivirus overexpressing CD44 was purchased from GeneChem (Shanghai, China)*.* siRNA sequences employed in this work are provided below:

| Name | Species | Strand | Sequence (5’-3’) |
| --- | --- | --- | --- |
| Negative Control | human | sense | UUC UCC GAA CGU GUC ACG UTT3 |
|  | human | antisense | ACG UGA CAC GUU CGG AGA ATT |
| LGALS9#si1 | human | sense | CUG GCU UCA GUG GAA AUG ATT |
|  | human | antisense | UCA UUU CCA CUG AAG CCA GTT |
| LGALS9#si2 | human | sense | CAC AUC GCC UUC CAC CUG ATT |
|  | human | antisense | UCA GGU GGA AGG CGA UGU GTT |
| CD44#si1 | human | sense | CCU CCC AGU AUG ACA CAU ATT |
|  | human | antisense | UAU GUG UCA UAC UGG GAG GTT |
| CD44#si2 | human | sense | CAG CAA CCC UAC UGA UGA UTT |
|  | human | antisense | AUC AUC AGU AGG GUU GCU GTT |

**mIF**

Tissue sections embedded in paraffin were initially subjected to a 45-minute heating step at 60 °C. Deparaffinization was carried out by treating the samples twice with a xylene alternative (10 minutes each), followed by hydration through a graded ethanol series: two changes of absolute ethanol (5 minutes each) and two changes of 95% ethanol (5 minutes each). After a 10-minute rinse under flowing water, epitope retrieval was conducted using a sodium citrate-based buffer.

Non-specific binding was inhibited via a 1-hour incubation with 10% bovine serum albumin (BSA) at ambient temperature. Sections were then treated with selected primary antibodies for 1 hour at room temperature and rinsed three times with Tris-buffered saline containing Tween® 20 (TBST; 5 minutes per wash). A secondary antibody application followed, with a 10-minute incubation period at room temperature, after which unbound conjugate was removed using three TBST washes (3 minutes each). Signal amplification was achieved using a fluorescent tyramide-based system, incubated for 10 minutes at room temperature, followed by another set of TBST washes. Additional antigen restoration was performed using sodium citrate buffer to conclude one staining cycle. This procedure was repeated iteratively to label multiple targets.

Upon completion of all protein marker staining, nuclei were visualized with 4′,6-diamidino-2-phenylindole (DAPI) applied for 5 minutes at room temperature. Excess dye was removed with three TBST washes (3 minutes each). Coverslips were finally mounted using a commercial anti-fade medium to preserve fluorescence. Imaging and evaluation were performed with a fluorescence microscope.

**Tables**

Table 1 characteristics of patients whose breast tissue were used for scRNA-seq

| Sample ID/Patient | Tumor Regions | Gender | Age | stage | ER | PR | HER2 | initial diagnosis | Lymph node Metastasis |
| --- | --- | --- | --- | --- | --- | --- | --- | --- | --- |
| 5074378 | border | Female | 34 | 3 | 95% | 15% | -(FISH) | Yes | Yes |
| 5074378 | adjacent normal | Female | 34 | 3 | 95% | 15% | -(FISH) | Yes | Yes |
| 5074481 | cores | Female | 57 | 2 | 90% | 60% | 3+ | Yes | Yes |
| 5074481 | adjacent normal | Female | 57 | 2 | 90% | 60% | 3+ | Yes | Yes |
| 5075124 | cores | Female | 30 | 2 | 70% | 30% | -(FISH) | Yes | No |
| 5075124 | adjacent normal | Female | 30 | 2 | 70% | 30% | -(FISH) | Yes | No |

Table 2 characteristics of patients whose tumor were used for isolation of CAFs or NFs experiments

| Sample ID | Age | ER | PR | HER2 | initial diagnosis | Lymph node Metastasis |
| --- | --- | --- | --- | --- | --- | --- |
| 5148842 | 71 | - | - | + | Yes | Yes |
| 5124277 | 59 | + | + | + | Yes | No |
| 5126394 | 64 | - | + | + | Yes | No |
| 5128155 | 58 | + | + | + | Yes | No |
| 5131834 | 41 | - | - | + | Yes | No |
| 5150410 | 53 | - | - | + | Yes | Yes |
| 5153953 | 60 | - | - | + | Yes | No |
| 5156515 | 54 | + | - | + | Yes | Yes |
| 5157713 | 65 | + | + | + | Yes | No |
| 251858 | 74 | + | + | + | Yes | No |
| 5159506 | 58 | - | - | + | Yes | Yes |
| 5159407 | 42 | - | - | + | Yes | Yes |
| 5170286 | 51 | - | - | + | Yes | Yes |

**Figure legend**

**
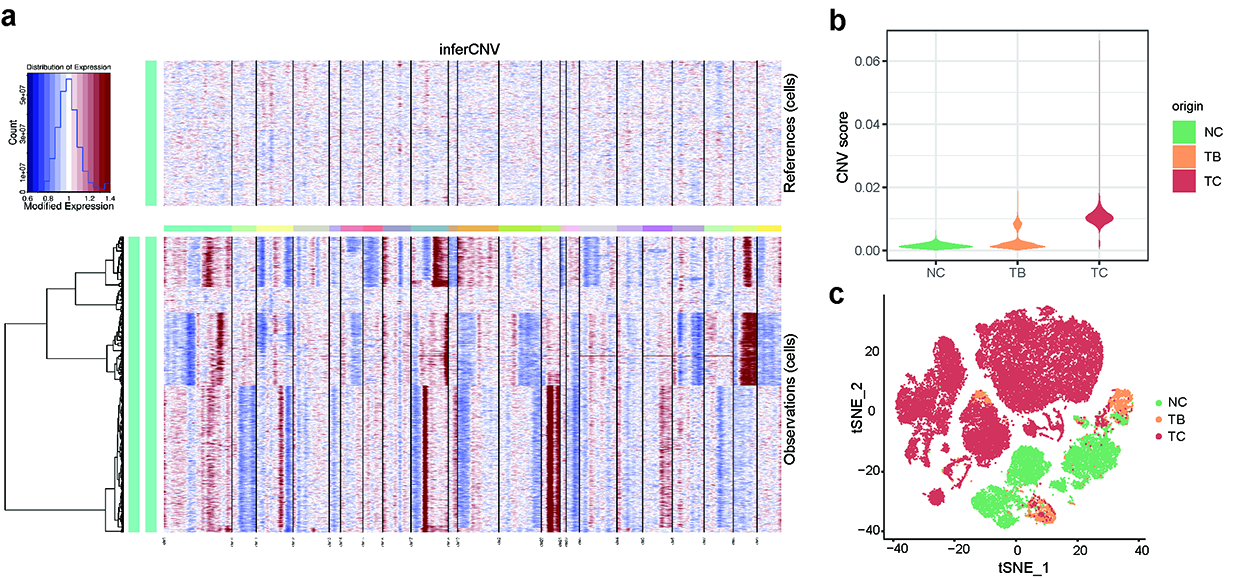
**

**Fig s1. Landscape of multiregional malignant cells.**

**a Heatmap showing inferred copy number variation (CNV) in MLs and basal cells**
The heatmap displays the inferred copy number variation (CNV) across the genome for Mamaryluminal (ML) cells and basal cells, based on single-cell RNA sequencing data. Each row represents an individual cell, while each column corresponds to a genomic region. The color gradient reflects the relative CNV levels, with red indicating amplification and blue representing deletion events. The top panel was the reference cells while the bottom panel was the observe cells.

**b. Violin plot of inferred CNV scores for MLs and basal cells**
The violin plot compares the distribution of inferred copy number variation (CNV) scores between MLs and basal cells. Each violin represents the CNV score distribution for the cells from different tumor regions, with wider areas indicating higher densities of cells with similar CNV scores

**c. t-SNE plot of MLs and basal cells colored by tumor region**
This t-SNE plot shows the clustering of ML and basal cells based on k-means clustering. Cells are colored according to their tumor regions.


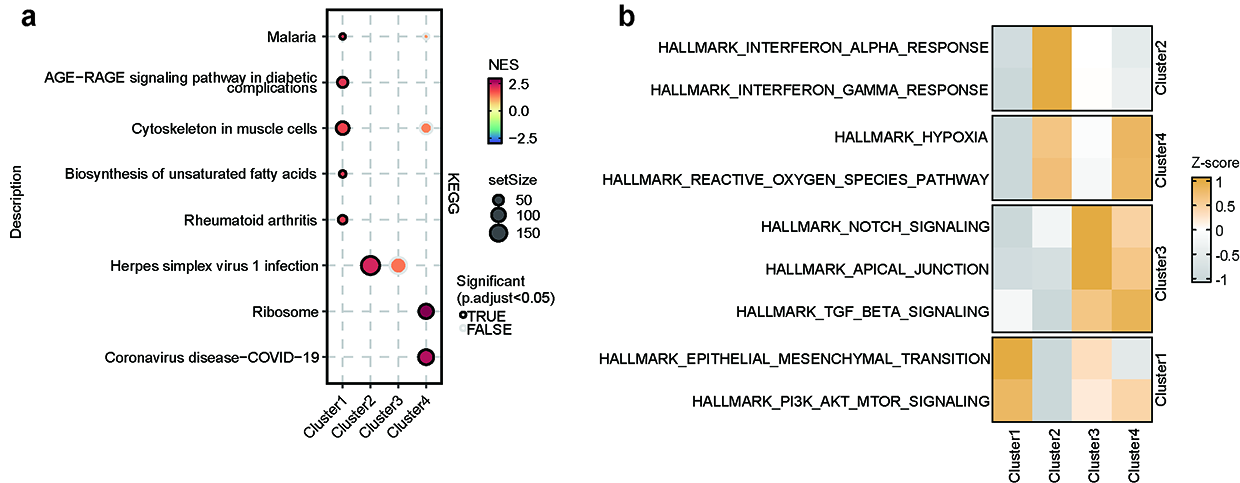


**Fig S2. Landscape of multiregional malignant cells-pseudotime**

**a** Dotplot of GSEA score across malignant cell clusters. The dot size and color represent the gene number and normalized enrichment score, respectively. The dot circle color represents the significant statues, which black indicated p adjust < 0.05 and lightgrey indicated p adjust >= 0.05.

**b** The represenntative heatmap of hallmark gene set module score across malignant cell clusters.


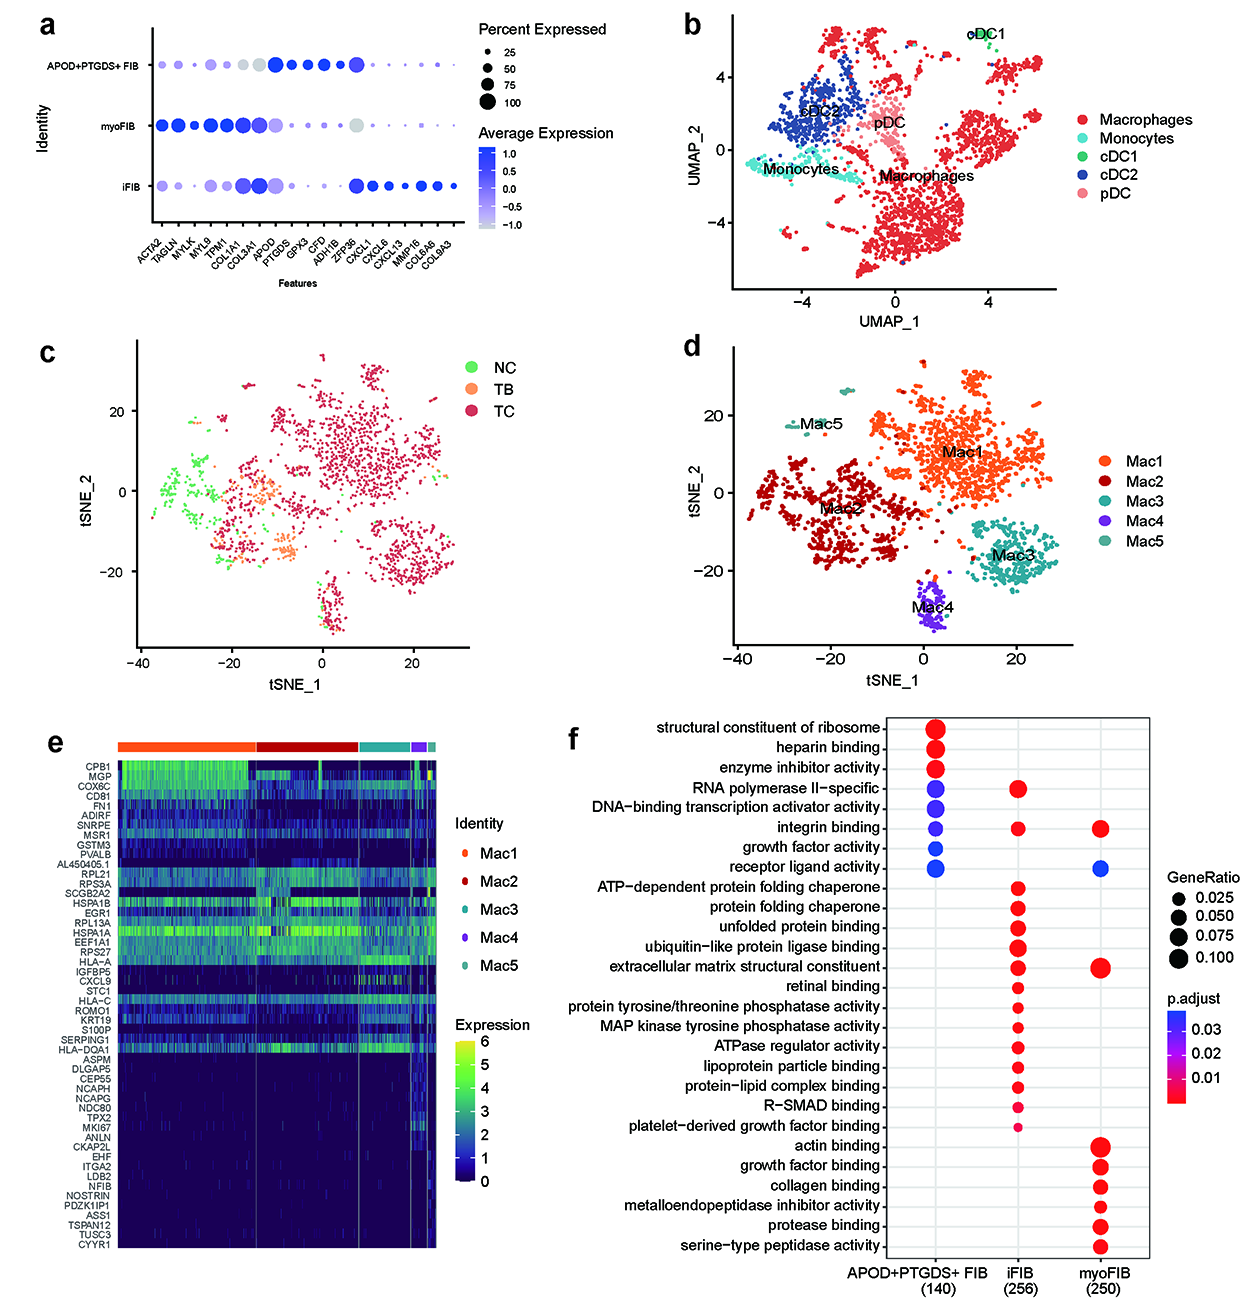


**Fig S3. The alternative activation of multiregional fibroblasts**

**a.** Dotplot of fibroblast subtype marker genes. The color represents the average expression while the size represents the expression percentage in the relative cell types.

**b.** UMAP plot of mononuclear phagecytes colored by cell subtype.

**c-d. t-SNE plot of macrophages colored by region and cell subtype**
This t-SNE (t-distributed Stochastic Neighbor Embedding) plot visualizes the distribution of macrophages based on their gene expression profiles.
**c.** Macrophages are colored according to their region of origin, including Normal Control (NC), Tumor Border (TB), and Tumor Core (TC). This visualization highlights the spatial distribution and regional specialization of macrophages within different tissue microenvironments.
**d.** Macrophages are colored by their assigned subtypes, showing distinct transcriptional clusters. Each color represents a specific macrophage subtype, indicating potential functional diversity among the macrophage populations based on their gene expression profiles.

**e. Heatmap of macrophage subtype marker genes**
This heatmap illustrates the expression patterns of key marker genes specific to each macrophage subtype. Each row represents a marker gene, and each column corresponds to a macrophage subtype. The color intensity indicates gene expression levels, with higher expression shown by darker shades. This heatmap confirms the transcriptional distinctions between macrophage subtypes, helping to define their molecular identities and potential roles in immune regulation and tumor microenvironment interactions.

**f. Dot plot of GO enrichment for fibroblast subtype marker genes**
The dot plot (located on the next page) shows the results of gene ontology (GO) enrichment analysis for the marker genes specific to each fibroblast subtype. The x-axis represents different fibroblast subtypes, while the y-axis lists enriched GO biological processes. Dot size corresponds to the percentage of genes in the subtype associated with a specific GO term, and the color intensity reflects the significance of enrichment. This plot highlights key biological processes associated with each fibroblast subtype, offering functional insights into their roles in tissue remodeling, immune interactions, and tumor progression.


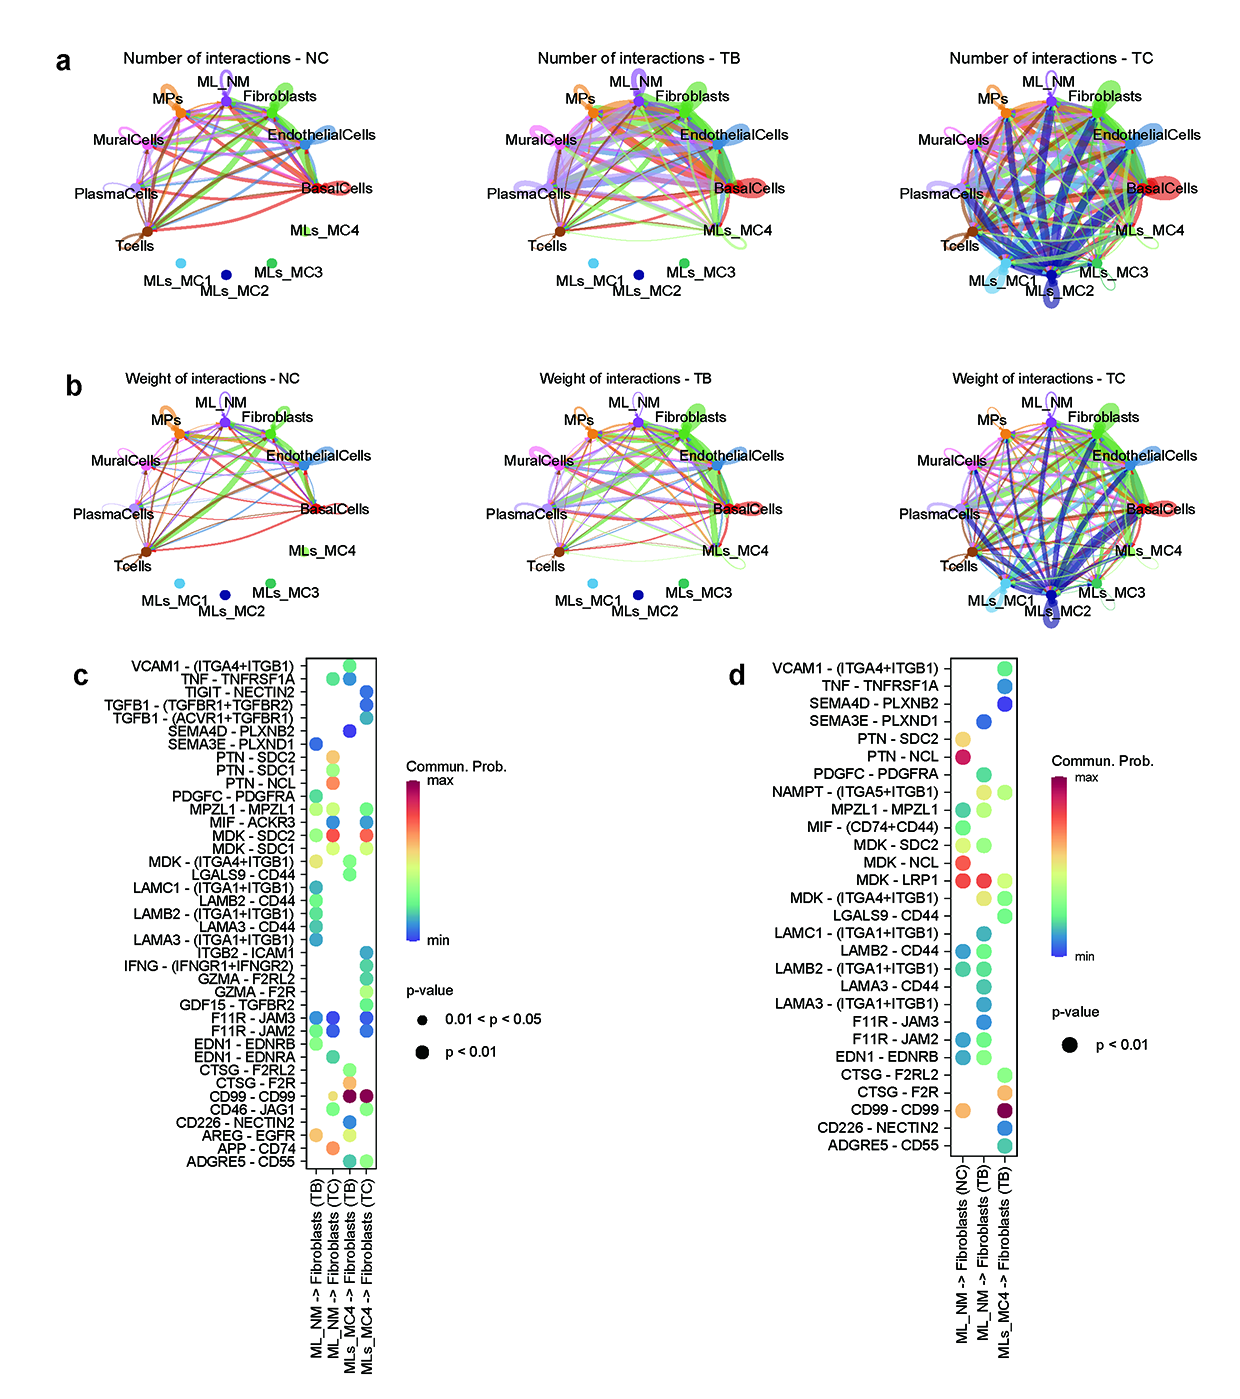


**Fig S4. The alternative cell-cell interaction of multiregional tumors**

**a-b. Circle plot of the number of interactions (b) or interaction strength (c) in the cell-cell communication network among multiple-region**

These circle plots visualize the cell-cell communication networks across different regions, based on the inferred number of interactions (b) and interaction strength (c).
**a.** The circle plot shows the number of interactions between different cell types, with each node representing a cell type and the edges representing the number of interactions between them. Thicker edges indicate a higher number of interactions. This plot reveals the complexity of cell-cell communication networks in the tumor microenvironment.
**b.** The circle plot depicts the strength of interactions between cell types. Each node represents a cell type, and the edge thickness corresponds to the interaction strength between the connected cell types. This plot emphasizes the intensity of communication between specific cell types, offering insights into which cell types dominate communication in different regions of the tissue.

**c-d. Differential ligand-receptor pairs in Normal and Cluster 4 ML cells across Healthy control (HC), Tumor Core (TC) and Tumor Border (TB)**
**c.** The plot shows differential ligand-receptor pairs between normal cells and Cluster 4 mesenchymal-like (ML) cells interacting with fibroblasts. Each pair is represented by lines connecting ligand-receptor interactions, with colors indicating significant differences in interaction strength or presence between TC and TB. Red lines denote increased interactions in TC compared to TB, while blue lines indicate decreased interactions. This figure highlights how ligand-receptor communication between ML cells and fibroblasts differs between tumor regions.
**d.** The plot shows differential ligand-receptor pairs between normal cells and Cluster 4 mesenchymal-like (ML) cells interacting with fibroblasts. Lines connect ligand-receptor pairs, with colors indicating significant changes in interaction strength or presence between TB and NC. Red lines denote increased interactions in TB compared to NC, while blue lines indicate decreased interactions.

**
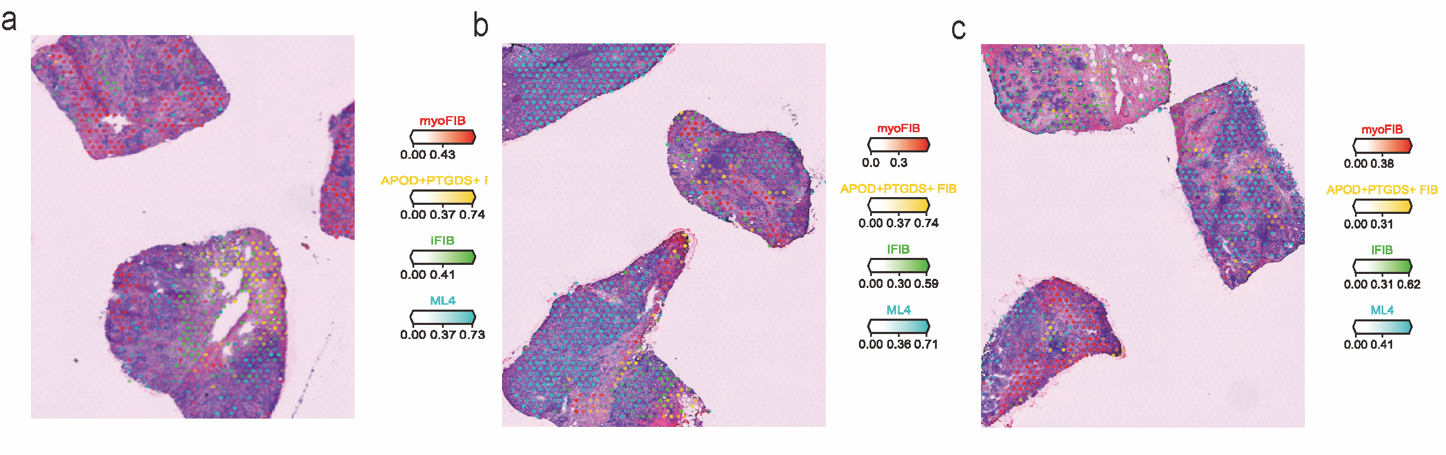
**

**FigS5.** **The spatial distribution of ML4 and fibroblast subtypes**

Spatial transcriptomics images of myoFIB, APOD+PTGDS+FIB, iFIB and ML4 in three representative TNBC slides.


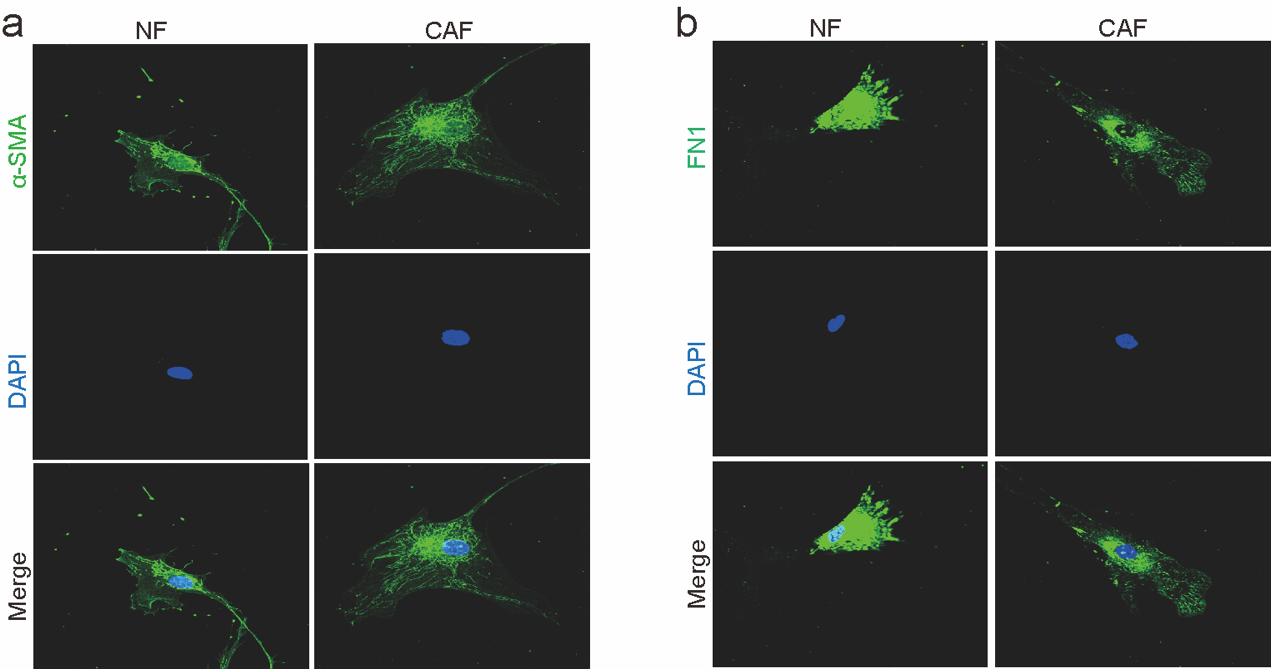


**FigS6.** Representative images show that NFs and CAFs isolated from fresh breast cancer specimens stained highly with myofibroblast markers (FN1 and α-SMA)
