# Supplementary material
Source: Research Square preprint supplement (doi:10.21203/rs.3.rs-9615677/v1)
Supplement: Supplementary file 2 [file 868eb69696907a2d3d8bd3be.pdf]

Original and unprocessed images A of figure 8b; B of figure 8d; C of figure 8e; D of figure 8f; F of figure 8j; G of figure 8m; H of figure 8h

figure 8b: Western blotting demonstrated that the conditioned medium of breast cell lines remarkably induced the protein expression of  $\alpha$ -SMA expression in tumor fibroblasts.  
WB anti-  $\alpha$ -SMA.

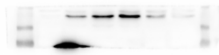

WB anti-GAPDH

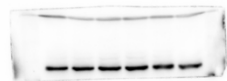

figure 8d: Western blotting demonstrated the protein expression of LGALS9 in BC cell lines.  
WB anti-LGALS9

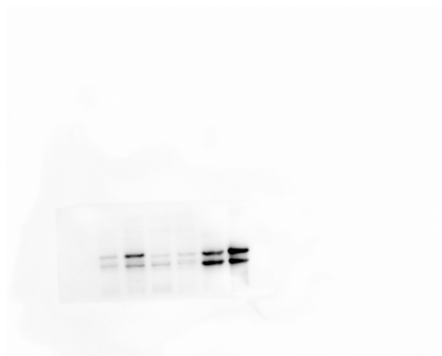

WB anti-GAPDH

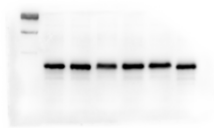

figure 8e: knocking down LGALS9 in 468 by small interfering RNA (siRNA) was measured by Western blotting.

WB anti-LGALS9

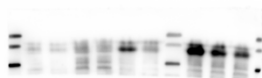

WB anti-GAPDH

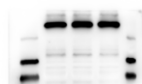

figure 8f: Western blotting demonstrated the conditioned medium of siLGALS9 suppressed the expression of  $\alpha$ -SMA in 468 cells.

WB anti- $\alpha$ -SMA

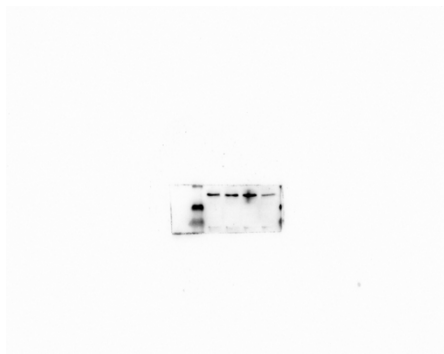

WB anti-GAPDH

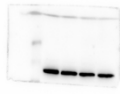

figure 8j: Western blotting demonstrated the overexpression of CD44 in primary tumor fibroblasts.

WB anti-CD44

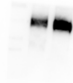

WB anti-GAPDH

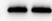

figure 8m: Western blotting demonstrated that the conditioned medium of CAF remarkably increased the expression of Twist1, Vimentin, p-Smad2/3, Smad3 while no changed the levels of E-cadherin in 468 cells.

WB anti-Twist1

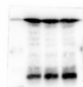

WB anti-Vimentin

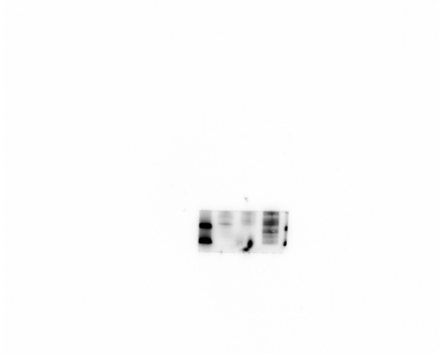

WB anti-E-cadherin

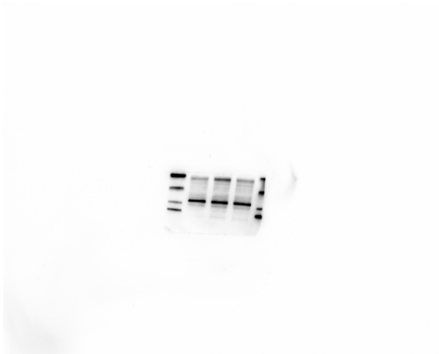

WB anti-p-Smad2/3

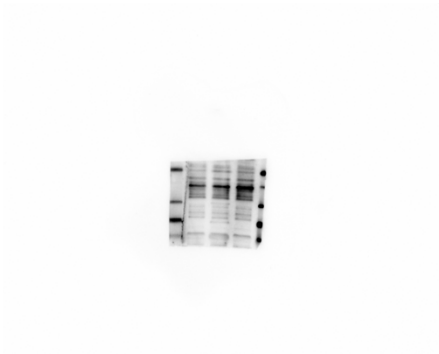

WB anti-Smad2

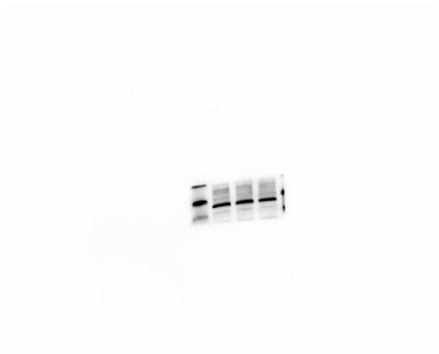

WB anti-Smad3

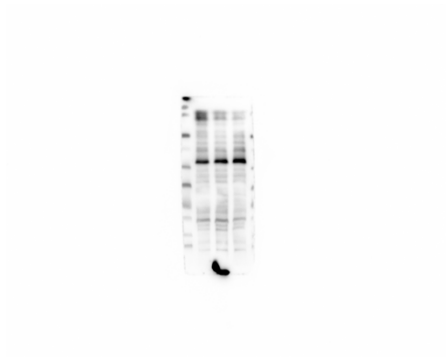

WB anti-GAPDH

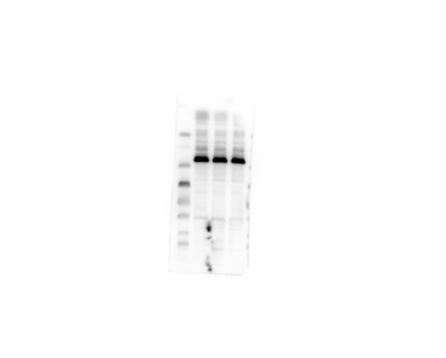

figure 8h  
WB anti-CD44

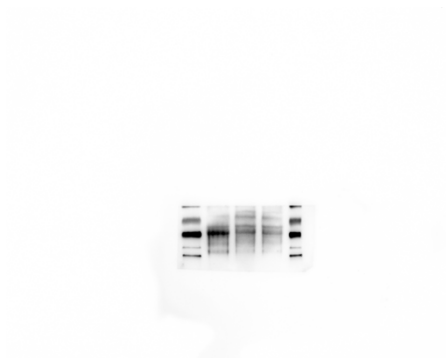

WB anti-GAPDH

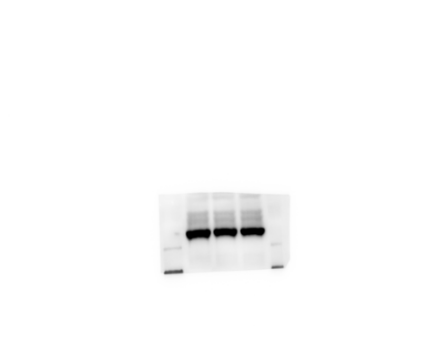

WB anti-GAPDH
